# Supplementary material
Source: Springer Nature journal article supplement (https://www.springermedizin.de/resource/supplementary/12992_2013_203_MOESM1_ESM.pdf/9616678)
Supplement: MOESM1 [file 9616678]

## Home-based screening

## Community-based screening (health fair)

Initial eligibility screening

Initial screening: N= 236

Initial screening: N=346

Phase 1: Screening

SBP $\geq$ 140mmHg  
N=42 (18%)

SBP $\geq$ 160mmHg  
N=13 (1%)

RBS $\geq$ 7.0mmol/L  
N=54 (23%)

SBP  $\geq$ 140mmHg  
N=104 (30%)

SBP  $\geq$ 160mmHg  
N=35 (10%)

RBS $\geq$ 7.0mmol/L  
N=27 (8%)

Phase 2: Confirmatory  
screening in health  
center

Confirmatory  
testing at HC  
N=4 (31%)

Confirmatory  
testing at HC  
N=12 (23%)

Confirmatory  
testing at HC  
N=11 (31%)

Confirmatory  
testing at HC  
N=6 (22%)

Confirmed disease

N=4 (100%)  
Disease  
Confirmed with  
SBP $\geq$ 140mmHg

N=3 (25%)  
confirmed  
diagnosis of DM

N=11 (100%)  
Disease  
Confirmed with  
SBP $\geq$ 140mmHg

N=2 (33%)  
confirmed  
diagnosis of DM

N= Number of participants

RBS= Random blood sugar

SBP= systolic blood pressure

HC= Health center

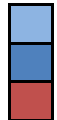

Participants with SBP greater than or equal to 140 mmHg

Participants with SBP greater than or equal to 160 mmHg

Participants with RBS greater than or equal to 7.0 mmol/L
